# Supplementary material
Source: PubMed Central journal article supplement (PMC3408139)
Supplement: supp_M112.369355_Supplemental_Data.pdf [file supp_M112.369355_Supplemental_Data.pdf]

## Supplementa Data

**Supplemental Figure 1.** Microarray analysis of gene expression in her-2 induced tumors. *A*, Total RNA was isolated from wild type and GnT-V knockout tumor tissues and used for detection of transcript levels of GnT-V by RT-PCR. T1-3 represents three tumor tissues collected from three different mice with *GnT-V* wild-type and knockout background, respectively. *B*, Heat map of 142 transcripts differentially expressed between wild-type and GnT-V knockout tumors was generated from the microarray data. The red color indicates high expression level, while blue indicates low expression level relative to wild-type. The top four Ingenuity Pathways Analysis (IPA)-picked molecular and cellular functions where altered transcripts involved are indicated on the left bottom. The number in parentheses indicates the number of transcripts in each.

**Supplemental Figure 2.** qRT-PCR validation of the transcript levels showing largest changes as detected by microarray analysis. *A*, Total RNA was isolated from wild-type and GnT-V knockout tumors and used for detection of transcript levels as indicated. For each transcript, the values are normalized to control (GAPDH or RPL4) and expressed as mean  $\pm$  SD (n=3). *B*, Fold-change (KO/WT) of gene expression detected by qRT-PCR was calculated.

**Supplemental Figure 3.** CpG island analysis of the promoter areas of the *Pcdh $\beta$*  gene cluster. The presence of CpG islands was analyzed around TSS sites (-1000 to +1000) in most altered genes of *Pcdh $\beta$*  cluster using the CpGplot program. Ratios of observed to expected CpG dinucleotide frequency were set up > 0.60 (top panel) with percentage of CG > 50% (middle panel) and length >50 bps (bottom panel). TSS: transcription starting site. *Cdh1* was chosen as control.

**Supplemental Figure 4.** Impaired her-2 mediated signaling in GnT-V null tumors. Mammary tumor sections from 10-week old tumor tissues were fixed and immunostained with anti-her-2/neu (top panel) and anti-p-PKB (bottom panel).

**Supplemental Figure 5.** Confirmation of overexpression of *Pcdh $\beta$ 4* and 19 in her-2 wild-type tumor cells and MDA-MB231 cells. *A*, Total RNA was isolated from control and *Pcdh $\beta$ 4* or 19 transfected tumor cells and used for detection of transcript levels of *Pcdh $\beta$ 4* (in *Pcdh $\beta$ 4*-transfected cells) and *Pcdh $\beta$ 19* (in *Pcdh $\beta$ 19*-transfected cells). For each transcript, the values are normalized to control (GAPDH or RPL4) and expressed as mean  $\pm$  SD (n=3). *B*, MDA-MB231 cells were grown on chamberslides, fixed, and stained for expression of *Pcdh $\beta$*  using anti-c-myc-tag antibody. *C*, Her-2 tumor cells with *Pcdh $\beta$ 4* expression were grown on chamberslides, fixed, and stained with anti-*Pcdh $\beta$ 4* antibody. Nuclei were counterstained by Dapi.

**Supplemental Figure 6.** Tumor growth in NOD/SCID mice was inhibited by expression of *Pcdh $\beta$*  genes. *A*, *Pcdh $\beta$ 19*-transfected MDA-MB231 tumor cells ( $2 \times 10^6$ ) were injected into mammary fat pads of SCID mice (n=4) and secondary tumor growth was observed for 10 weeks. \*: p<0.05. H&E staining of secondary tumor tissues formed after injecting *Pcdh $\beta$ 4*-transfected her-2 tumor cells (*B*) and *Pcdh $\beta$ 19*-transfected MDA-MB231 cells (*C*) into the mammary fat pads of SCID mice. Arrows indicate mitotic cells.

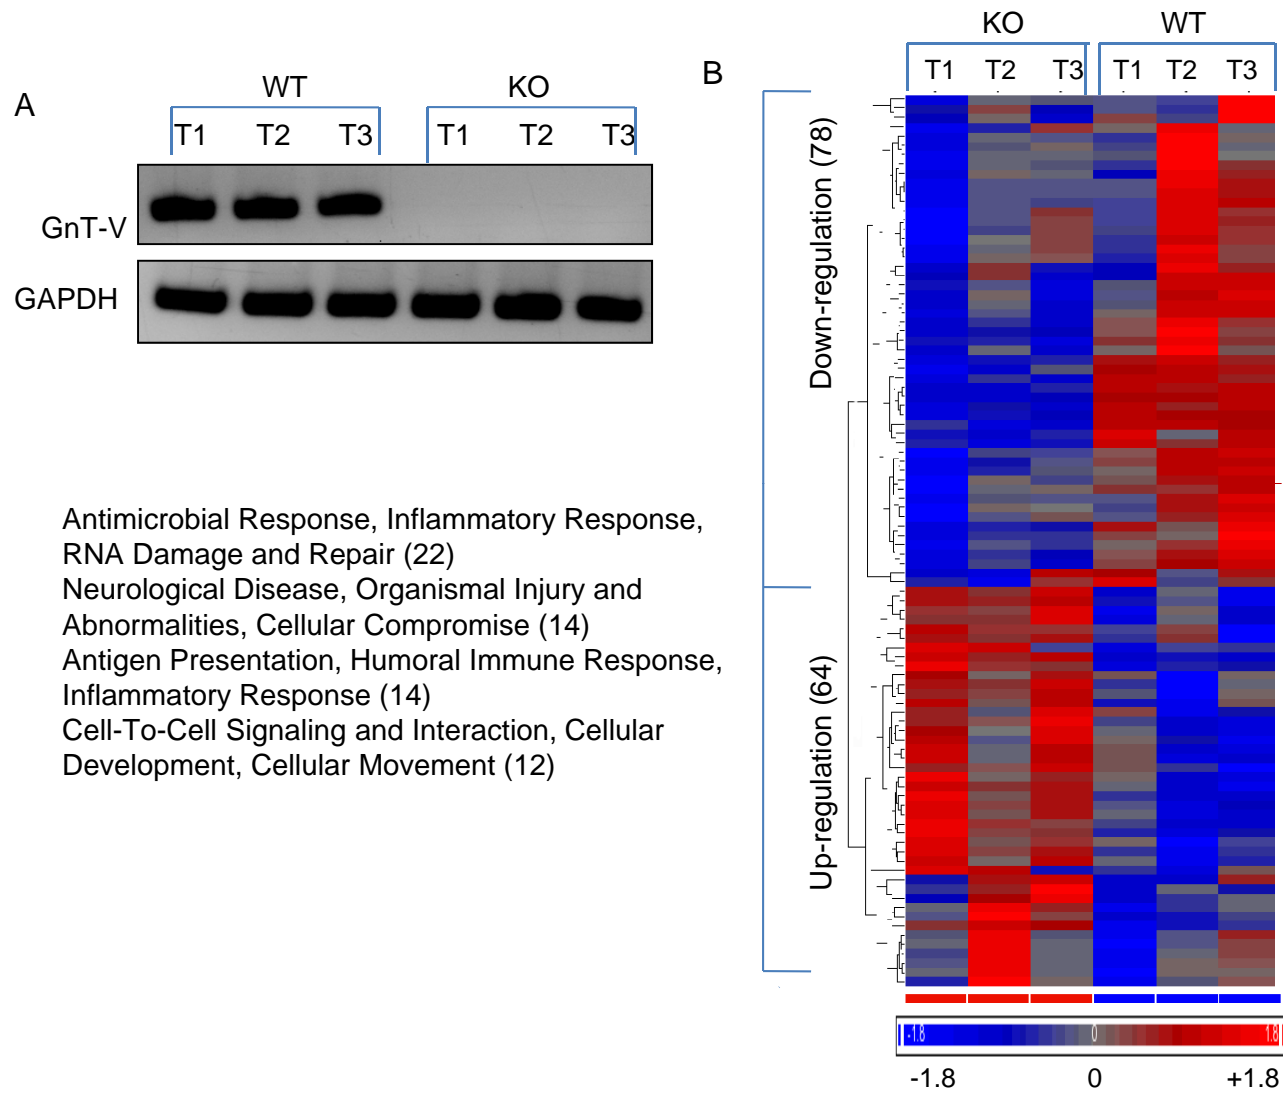

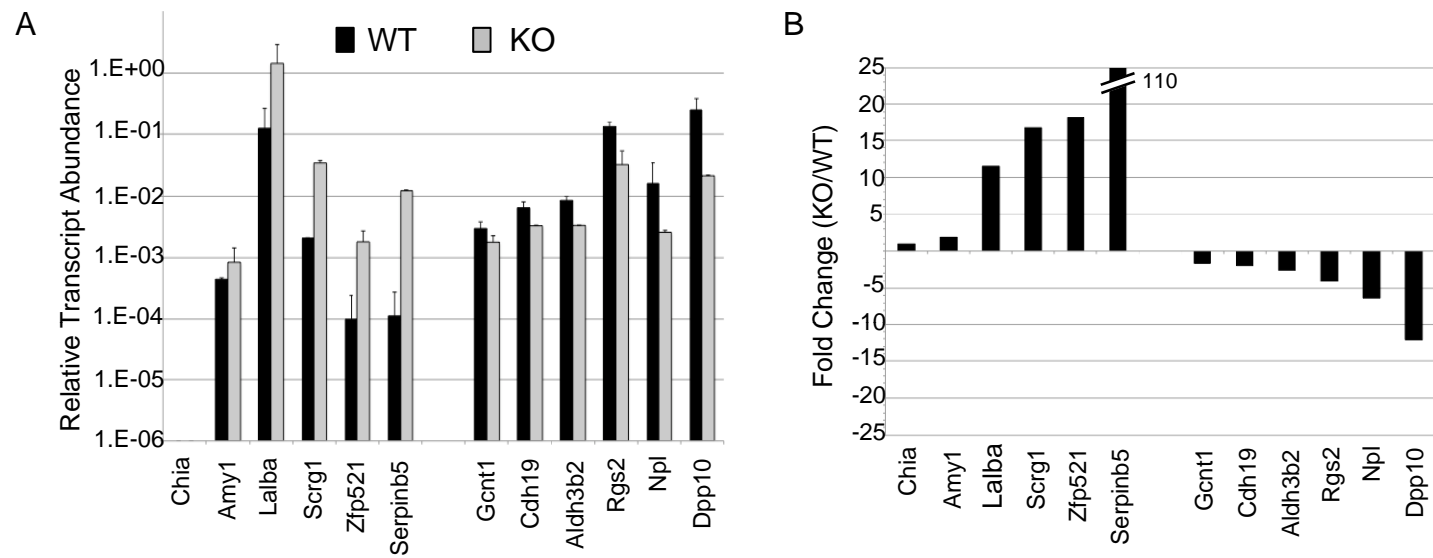

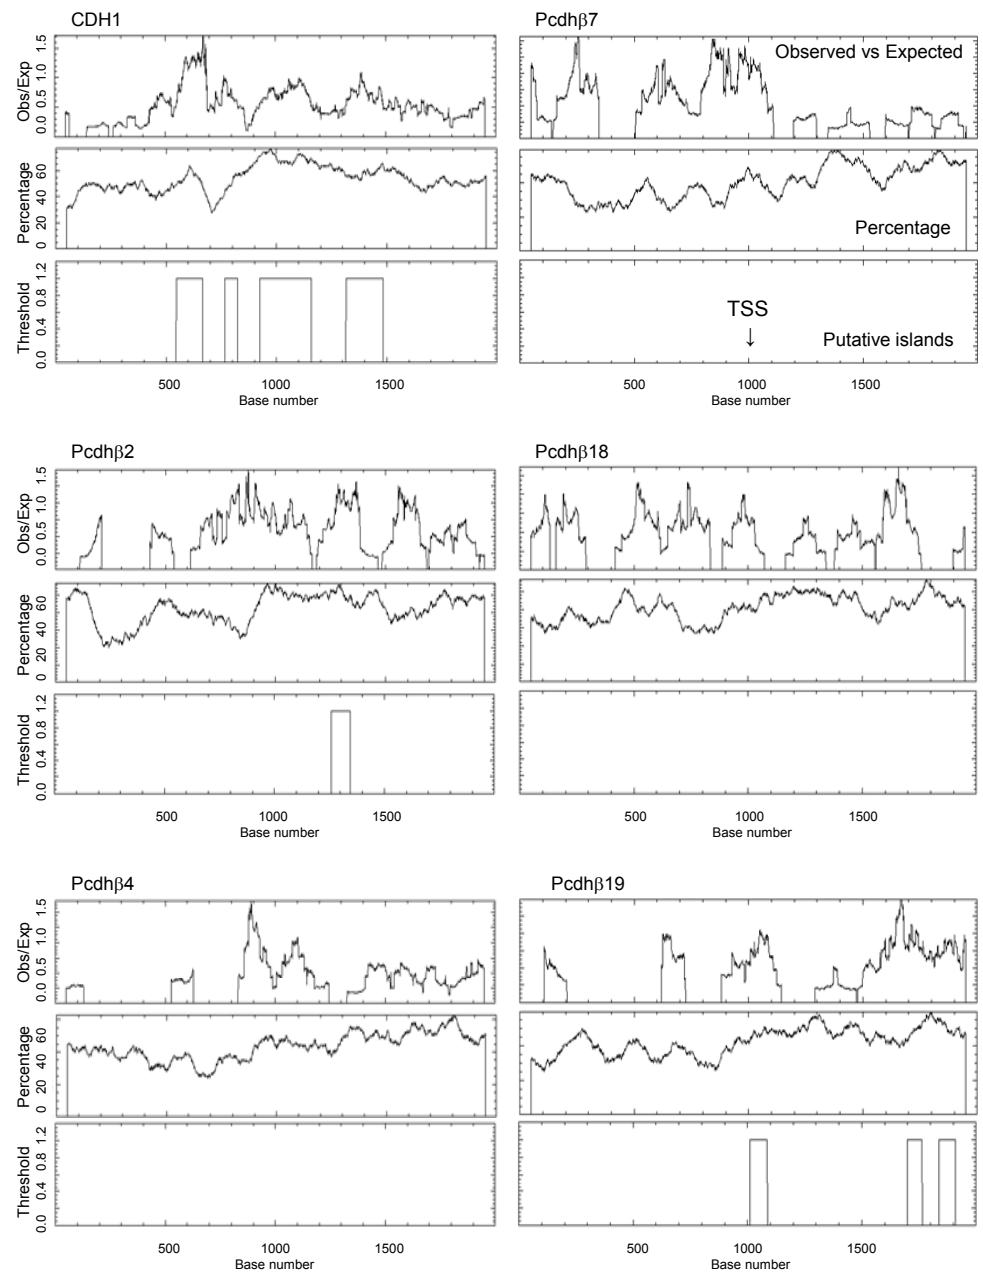

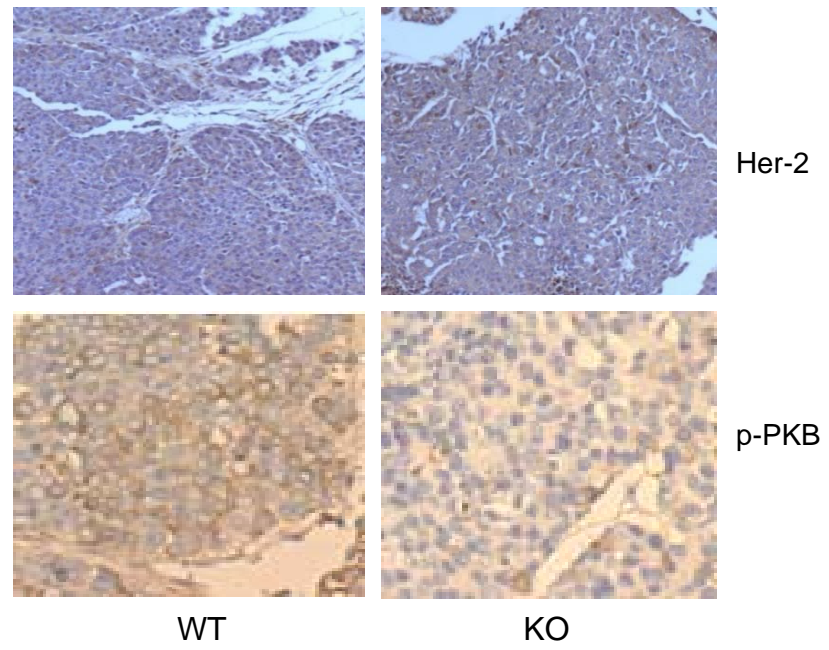

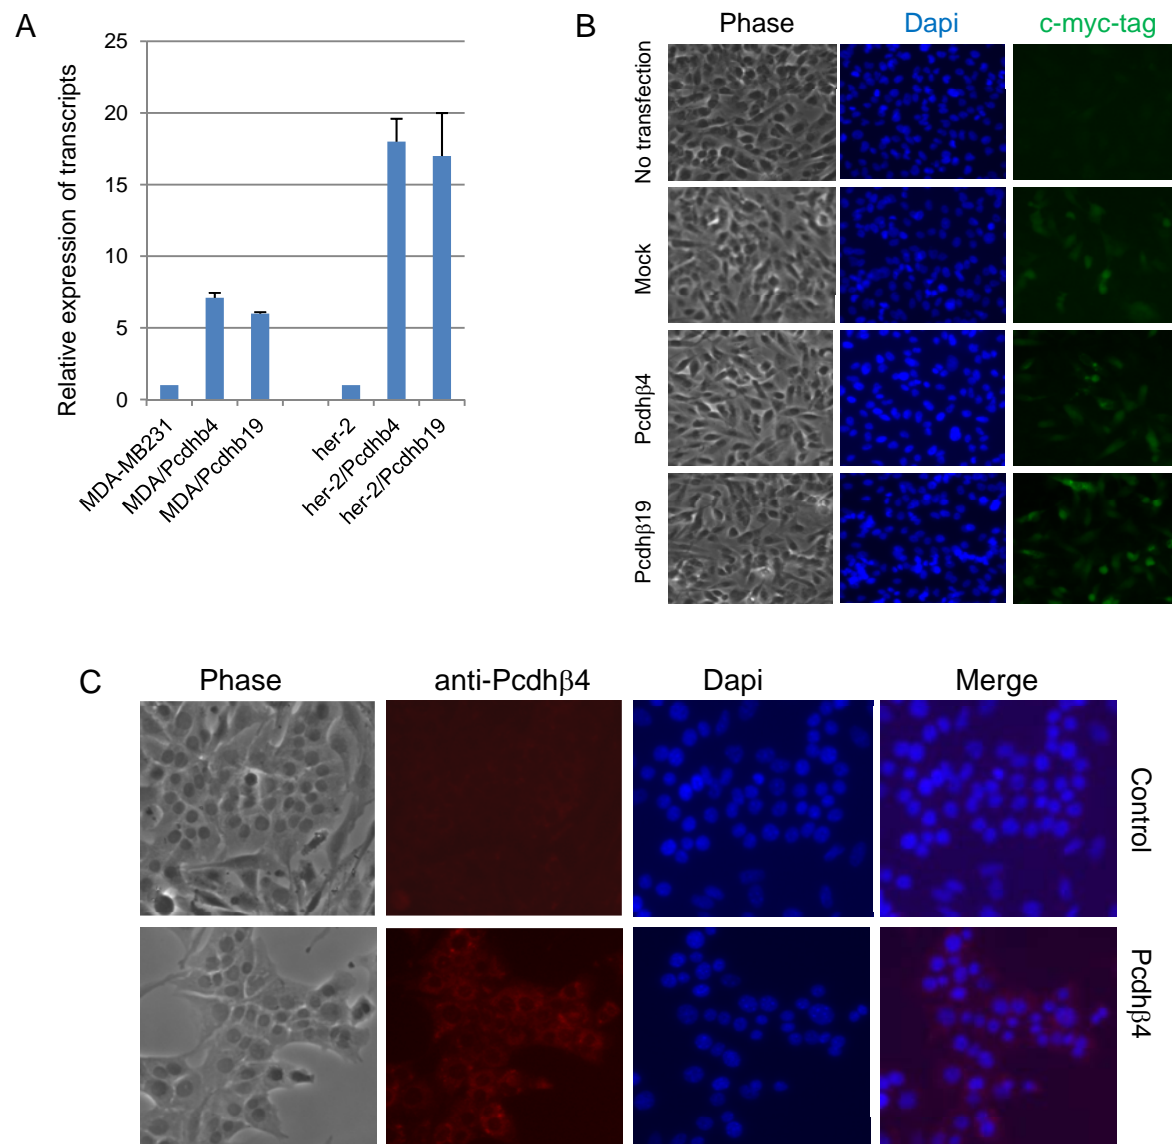

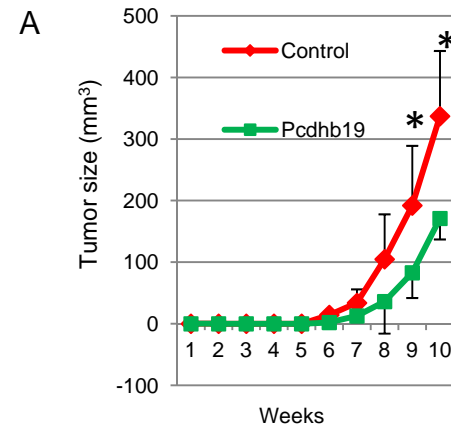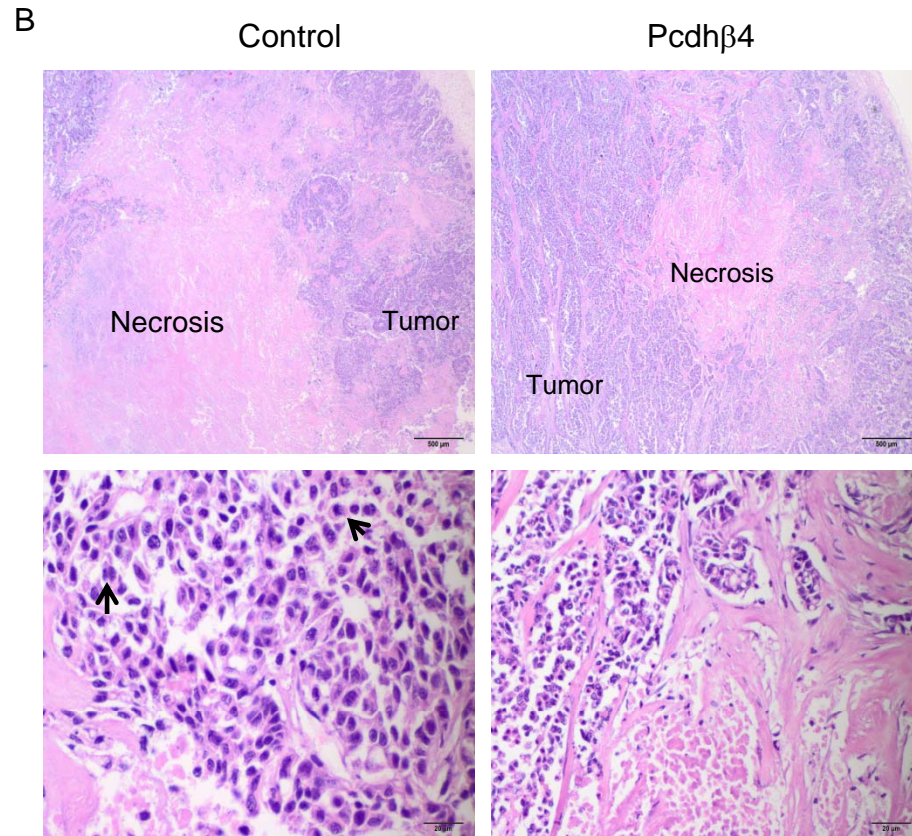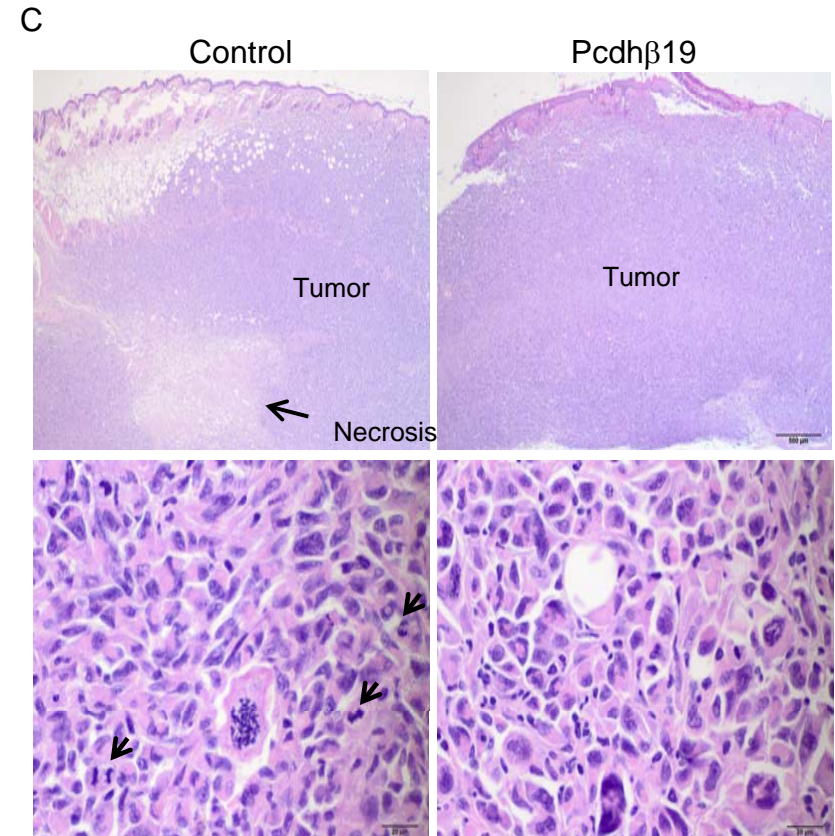

Guo et al. Fig. S6



**Table S1. Sequences of primers used in qRT-PCR**

| Gene                                                       | Symbol   | Accession number | Forward primer (5' -3') | Reverse primer (5' - 3') |
|------------------------------------------------------------|----------|------------------|-------------------------|--------------------------|
| <b>Mouse</b>                                               |          |                  |                         |                          |
| Aldehyde dehydrogenase 3 family, member B2                 | Aldh3b2  | NM_001177438     | gcttaatgacctccgttaccc   | cctatggcccagcttatcag     |
| Amylase 1, salivary                                        | Amy1     | NM_007446        | gctcaagctggacaaagca     | aggggaactccaggaaagtcc    |
| Cadherin 19, type 2                                        | Cdh19    | NM_001081386     | gcccagacagtgccatatt     | gagcacatgggtctgtgtg      |
| Chitinase, acidic                                          | Chia     | NM_023186        | gaaccgccagaccttcatta    | caggtccagtcctcaaaacc     |
| Dipeptidylpeptidase 10                                     | Dpp10    | NM_199021        | tgatggcagaggaagtga      | gcctccactgagcctatcc      |
| Glucosaminyl (N-acetyl) transferase 1, core 2              | Gcnt1    | NM_173442        | cgaaggccatgtttccaacgg   | tccgaagacgcacacagagc     |
| Lactalbumin, alpha                                         | Lalba    | NM_010679        | cggactctccagatcagtga    | gccacagatgttcccgact      |
| N-acetylneuraminate pyruvate lyase                         | Npl      | NM_028749        | catcatgacgctggtctctg    | gtaaactcctgggtggtcttc    |
| Regulator of G-protein signaling 2                         | Rgs2     | NM_009061        | atgggctggctgcatc        | gtcttcacaagccaaccagaa    |
| Scrapie responsive gene 1                                  | Scrg1    | NM_009136        | atccttgggctaactttgctg   | ctgtagcaggagagcgagct     |
| Serine/cysteine peptidase inhibitor, clade B, member 5     | Serpinb5 | NM_009257        | tgctgctactttgttgaa      | tgctgattctgaaaggacattc   |
| Zinc finger protein 521                                    | Zfp521   | NM_145492        | ctcttcgagcatttgctcag    | ctgctggtgactgtccatgt     |
| Protocadherin beta 1                                       | Pcdhb1   | NM_053126        | cacagcaaagtcctgttgga    | ctggacaccgaggagattgt     |
| Protocadherin beta 2                                       | Pcdhb2   | NM_053127        | cagcccacctggtagatgtt    | ctccagtcaggcacacttca     |
| Protocadherin beta 3                                       | Pcdhb3   | NM_053128        | aactctcacagccctggatg    | aagaccaggatgtggacctg     |
| Protocadherin beta 4                                       | Pcdhb4   | NM_053129        | gtcacagcaaaggcaagt      | ctctgaaccagacaccaca      |
| Protocadherin beta 5                                       | Pcdhb5   | NM_053130        | tcgaaacaggcaactgattcct  | gacagagtaccgagtaggca     |
| Protocadherin beta 6                                       | Pcdhb6   | NM_053131        | cattgtccagagctaccagt    | tttgaaatctgtgtccagag     |
| Protocadherin beta 7                                       | Pcdhb7   | NM_053132        | tcagagttcagcatttcaaagc  | atgaggtcccattgagtgt      |
| Protocadherin beta 8                                       | Pcdhb8   | NM_053133        | ctctggctgactgctattcc    | cgcaccactgacatccac       |
| Protocadherin beta 9                                       | Pcdhb9   | NM_053134        | atgagcaacacggtagaagattc | ctttctccatgataggaaatgca  |
| Protocadherin beta 10                                      | Pcdhb10  | NM_053135        | tccttaaacccatgatctcca   | gtgcggactttccttcact      |
| Protocadherin beta 11                                      | Pcdhb11  | NM_053136        | tctatgaggtgcagattctcga  | ccctggcagagactgtaacaa    |
| Protocadherin beta 12                                      | Pcdhb12  | NM_053137        | agcctccctgggtgattact    | ccctgctctactgacatccac    |
| Protocadherin beta 13                                      | Pcdhb13  | NM_053138        | gtgcaagacaaggcaagtga    | aattgatcctgaaccacctc     |
| Protocadherin beta 14                                      | Pcdhb14  | NM_053139        | gcaagtgaccgccattatct    | acggaatacgtgatggtgc      |
| Protocadherin beta 15                                      | Pcdhb15  | NM_053140        | tgagcgtcttggtctag       | gtccctctctcggttctc       |
| Protocadherin beta 16                                      | Pcdhb16  | NM_053141        | gccagcaggaagctcatt      | tgcatgcttagagggaagc      |
| Protocadherin beta 17                                      | Pcdhb17  | NM_053142        | gcatggatgtgcaatctgag    | ccctgacacatgcagcaa       |
| Protocadherin beta 18                                      | Pcdhb18  | NM_053143        | cagggtctgagcttgacgt     | ttgctaggttcgccacaaat     |
| Protocadherin beta 19                                      | Pcdhb19  | NM_053144        | gacaaggcaagtcctgcttc    | agtctcccagcctcagagt      |
| Protocadherin beta 20                                      | Pcdhb20  | NM_053145        | gcgagtgtgaatcttgc       | ttgcccagattagccacaaa     |
| Protocadherin beta 21                                      | Pcdhb21  | NM_053146        | tgtgccagaagaaatggaga    | ccagatcaccacatccata      |
| Protocadherin beta 22                                      | Pcdhb22  | NM_053147        | ctttctctgctgggagtg      | ctgggtgttctccatcac       |
| Cadherin 1                                                 | Cdh1     | NM_009864        | ggccaagcagcaatcacctct   | tgtggaagggaacaagagacc    |
| RAS guanyl releasing protein 1                             | Rasgrp1  | NM_011246        | tgtcacagctccatctccag    | ttcaccttccatctccag       |
| Neuronal PAS domain protein 3                              | Npas3    | NM_013780        | cctccaccaaacacctcagt    | cctgtcagctccactgtga      |
| Reversion-inducing-cysteine-rich protein with kazal motifs | Reck     | NM_016678        | gcacagaatggacgcactta    | actgtgtgtttggcacaca      |
| Eph receptor A4                                            | Epha4    | NM_007936        | taccccgcaatgaagttac     | atcacgttgacacactggt      |
| Mannoside N-acetylglucosaminyltransferase V                | Mgat5    | NM_145128        | ccctggaagttgtcctctca    | tcctctgccagtgcttaat      |
| Glyceraldehyde-3-phosphate dehydrogenase <sup>a</sup>      | Gapdh    | NM_008084        | tgcgactcaacagcaactc     | atgtaggccatgaggtccac     |
| Ribosomal protein L4 <sup>a</sup>                          | Rpl4     | NM_024212        | gacagccctatgccgtcagtg   | gccacagctctgcaggtacc     |
| <b>Human</b>                                               |          |                  |                         |                          |
| Protocadherin beta 6                                       | Pcdhb6   | NM_018939        | ccaaccctcgaaataaacg     | aaatccaagcctttctcagc     |
| Protocadherin beta 8                                       | Pcdhb8   | NM_019120        | atcaccgtcactgacttaggg   | ccagcacggtcatattgaga     |



|                                                       |         |           |                       |                          |
|-------------------------------------------------------|---------|-----------|-----------------------|--------------------------|
| Protocadherin beta 13                                 | Pcdhb13 | NM_018933 | ggatgccaaagggaggac    | ccagtatctgaggctgtggttatt |
| Mannoside N-acetylglucosaminyltransferase V           | Mgat5   | NM_002410 | gagcagatcctggacctcag  | gctgtcatgactccagcgta     |
| Glyceraldehyde-3-phosphate dehydrogenase <sup>a</sup> | Gapdh   | NM_002046 | tggacctgacctgccgtctag | cctccgacgcctgcttcac      |

<sup>a</sup>Normalization control gene

**Table S2. Sequences of primers used in methylation-specific PCR (MS-PCR)**

| Gene                  | Symbol  | Accession number |        | Forward primer (5' -3')                                     | Reverse primer (5' - 3')                                       |
|-----------------------|---------|------------------|--------|-------------------------------------------------------------|----------------------------------------------------------------|
| Protocadherin beta 2  | Pcdhb2  | NM_053127        | U<br>M | TTAGGTTGGGTTTATAATTAGGTGT<br>GTTTAGGTTGGGTTTATAATTAGGC      | TTCCCTTTAAAAATAACTCACAAT<br>CCCTTTAAAAATAACTCGCGAT             |
| Protocadherin beta 3  | Pcdhb3  | NM_053128        | U<br>M | AGTTGAAAGTTTTGGAAAATTTTGT<br>GTTGAAAGTTTTGGAAAATTTTCGT      | AATTAACTAATCTCTAACTACTCTTCCCA<br>AATTAACTAATCTCTAACTACTCTTCCCG |
| Protocadherin beta 13 | Pcdhb13 | NM_053138        | U<br>M | AGTAAGAATTTTTAGTGTTTTTAGATTTT<br>AGAATTTTTTAGCGTTTTTAGATTTC | AATTAATCATACAAATTCCCAAT<br>AAATTAATCGTACAAATCCCGAT             |
| Protocadherin beta 19 | Pcdhb19 | NM_053144        | U<br>M | GGAGATTTGTTTTTAGTGAATTGT<br>GGAGATTTGTTTTTAGTGAATCGT        | CAAAAAAATTATCATTTACATCCATA<br>ACGAAAAAATTATCATTTACATCCG        |
| Cadherin 1            | Cdh1    | NM_009864        | U<br>M | TTTTTAGTTAATTAGTGGTGTGG<br>GTTTTAGTTAATTAGCGGCGTC           | CACTAAACTCAAATACAATCAAA<br>ACACTAAACTCGAATACGATCGAA            |

U: unmethylated; M: methylated

**Table S3. Differential expression of genes detected by microarray**

| Gene Symbol        | RefSeq             | p-value  | Fold-change (KO/WT) |
|--------------------|--------------------|----------|---------------------|
| B930036N10Rik      | AK047216           | 0.098114 | 6.55705             |
| Vmn2r96            | NM_001104547       | 0.08262  | 6.3862              |
|                    | ---                | 0.071774 | 6.32384             |
| Scrg1              | NM_009136          | 0.023531 | 3.86718             |
|                    | ---                | 0.022472 | 3.79211             |
| Serpib5            | NM_009257          | 0.082417 | 3.75104             |
| ENSMUSG00000072618 | ENSMUST00000100713 | 0.016753 | 3.72366             |
| 2310057J18Rik      | NM_026336          | 0.232719 | 3.67941             |
| Chia               | NM_023186          | 0.302765 | 3.50042             |
| Lalba              | NM_010679          | 0.151283 | 3.24237             |
|                    | ---                | 0.053444 | 3.23159             |
| Zfp521             | NM_145492          | 0.020746 | 3.12831             |
| E330013P04Rik      | NR_026942          | 0.36213  | 3.11411             |
| Amy1               | NM_007446          | 0.290835 | 2.93382             |
| Smoc1              | NM_001146217       | 0.027821 | 2.88559             |
| 1700040L02Rik      | BC087900           | 0.004049 | 2.81943             |
| Cldn8              | NM_018778          | 0.045599 | 2.66327             |
| Fermt1             | NM_198029          | 0.317376 | 2.6539              |
| Vtcn1              | NM_178594          | 0.022682 | 2.55331             |
| Rbp1               | NM_011254          | 0.103652 | 2.54128             |
| Casp12             | NM_009808          | 0.017624 | 2.50816             |
|                    | ---                | 0.037019 | 2.49757             |
| Kcnj15             | NM_019664          | 0.257777 | 2.47567             |
| Nqo1               | NM_008706          | 0.020957 | 2.4185              |
|                    | ---                | 0.048788 | 2.41597             |
| Rnasel             | NM_011882          | 0.136777 | 2.39604             |
| Lect1              | NM_010701          | 0.077178 | 2.39435             |
| Pcdhb6             | NM_053131          | 0.094767 | 2.38506             |
| Nxf7               | NM_130888          | 0.219268 | 2.38275             |
| Smr3a              | NM_011422          | 0.392494 | 2.36647             |
| Cyp2d22            | NM_019823          | 0.099721 | 2.35066             |
| Pcdhb11            | NM_053136          | 0.116768 | 2.33405             |
| Cytip              | NM_139200          | 0.039081 | 2.33386             |
| Scrn1              | NM_027268          | 0.026819 | 2.32697             |
| Zfp239             | NM_001001792       | 0.130009 | 2.29707             |
|                    | ---                | 0.021262 | 2.29063             |
| Odam               | NM_027128          | 0.372451 | 2.26607             |
| Crisp1             | NM_009638          | 0.095797 | 2.25761             |
|                    | ---                | 0.080433 | 2.23904             |

|                    |                    |          |          |
|--------------------|--------------------|----------|----------|
|                    | ---                | 0.163611 | 2.23747  |
|                    | ---                | 0.009639 | 2.23546  |
| Arntl2             | NM_172309          | 0.12843  | 2.22943  |
| Pcdhb18            | NM_053143          | 0.021566 | 2.21905  |
|                    | ---                | 0.036855 | 2.21008  |
|                    | ---                | 0.030372 | 2.20457  |
| Pip                | NM_008843          | 0.386624 | 2.1838   |
| Pcdhb7             | NM_053132          | 0.049552 | 2.15923  |
| Fam150b            | NM_001159743       | 0.064585 | 2.14069  |
| Cst10              | NM_021405          | 0.374166 | 2.13611  |
| Cd14               | NM_009841          | 0.000607 | 2.13547  |
| Slc38a3            | NM_023805          | 0.00921  | 2.13304  |
| Pcdhb2             | NM_053127          | 0.048118 | 2.11683  |
| Muc15              | NM_172979          | 0.043913 | 2.11666  |
| Tubb2b             | NM_023716          | 0.05763  | 2.1079   |
|                    | ---                | 0.121762 | 2.08922  |
|                    | ---                | 0.037103 | 2.077    |
| Thsd4              | NM_001040426       | 0.041443 | 2.06645  |
| OTTMUSG00000015351 | ENSMUST00000099395 | 0.09831  | 2.05147  |
| Pcdhb4             | NM_053129          | 0.038903 | 2.04059  |
|                    | ---                | 0.009093 | 2.03234  |
| Pcdhb19            | NM_053144          | 0.020934 | 2.02627  |
| Ddo                | NM_027442          | 0.017712 | 2.01305  |
| Nox4               | NM_015760          | 0.255613 | 2.01048  |
| Cldn2              | NM_016675          | 0.099988 | 2.00173  |
|                    | ---                | 0.288824 | -2.00321 |
| Prom1              | NM_008935          | 0.051685 | -2.01073 |
|                    | ---                | 0.034671 | -2.01378 |
| Slc38a1            | NM_134086          | 0.33995  | -2.01623 |
| EG546714           | XR_033405          | 0.235945 | -2.0251  |
| EG240327           | NM_001033767       | 0.302275 | -2.02514 |
|                    | ---                | 0.002031 | -2.03624 |
|                    | ---                | 0.075336 | -2.04699 |
| 3632451O06Rik      | NM_026142          | 0.318044 | -2.04823 |
|                    | ---                | 0.028619 | -2.0569  |
| H2-Q6              | NM_207648          | 0.339281 | -2.07207 |
| Fam125b            | BC059907           | 0.138111 | -2.07544 |
|                    | ---                | 0.02368  | -2.07973 |
| Masp1              | NM_008555          | 0.32383  | -2.08409 |
| H2-T22             | NM_010397          | 0.323309 | -2.10938 |
| Mgat5              | NM_145128          | 0.00044  | -2.11392 |
| Ifi44              | NM_133871          | 0.333874 | -2.12046 |
| Hspa1a             | NM_010479          | 0.010781 | -2.13604 |

|                    |                    |          |          |
|--------------------|--------------------|----------|----------|
| Kcnj13             | NM_001110227       | 0.012275 | -2.13735 |
| 4930503L19Rik      | NM_172967          | 0.123851 | -2.14255 |
| Irf7               | NM_016850          | 0.285127 | -2.14528 |
| ENSMUSG00000074338 | ENSMUST00000098753 | 0.070983 | -2.14572 |
| Xaf1               | NM_001037713       | 0.24696  | -2.14863 |
| Oas2               | NM_145227          | 0.299249 | -2.16678 |
| Fndc3c1            | NM_001007580       | 0.38789  | -2.1785  |
|                    | ---                | 0.01239  | -2.1894  |
|                    | ---                | 0.343579 | -2.20348 |
| Prrg3              | NM_001081135       | 0.293288 | -2.21033 |
| Zic3               | NM_009575          | 0.082876 | -2.21726 |
| Sv2c               | NM_029210          | 0.034726 | -2.22967 |
|                    | ---                | 0.088689 | -2.23248 |
| Aldh3b2            | ENSMUST00000100032 | 0.056715 | -2.23401 |
| 3110007F17Rik      | BC027572           | 0.134285 | -2.2395  |
| Eno2               | NM_013509          | 4.32E-05 | -2.24011 |
| Gbp3               | NM_018734          | 0.214679 | -2.25156 |
| Ablim3             | NM_198649          | 0.020009 | -2.25541 |
| Tox3               | NM_172913          | 0.040529 | -2.26008 |
| Ak3l1              | NM_009647          | 0.003423 | -2.26087 |
|                    | ---                | 0.126934 | -2.26874 |
| A2m                | NM_175628          | 0.316066 | -2.28987 |
| Igfbp4             | NM_010517          | 0.027816 | -2.30083 |
| Rasgrp1            | NM_011246          | 0.015876 | -2.32995 |
| 3110007F17Rik      | BC027572           | 0.085889 | -2.34447 |
| 3110007F17Rik      | BC027572           | 0.086488 | -2.34842 |
|                    | ---                | 0.087033 | -2.41889 |
| Cnksr2             | NM_177751          | 0.062454 | -2.42852 |
| Apol9b             | NM_173743          | 0.109329 | -2.43259 |
| Osbp16             | NM_145525          | 0.126167 | -2.4537  |
| Ifit3              | NM_010501          | 0.35072  | -2.46503 |
| Prol1              | NM_008644          | 0.232442 | -2.47301 |
| Adcy8              | NM_009623          | 0.206611 | -2.48208 |
| Ifit1              | NM_008331          | 0.264036 | -2.50971 |
| H2afy2             | NM_207000          | 0.107156 | -2.56499 |
| Mkx                | NM_177595          | 0.022573 | -2.66449 |
| Ifi202b            | NM_008327          | 0.005126 | -2.69043 |
| D17H6S56E-5        | L78788             | 0.195089 | -2.69761 |
| Usp18              | NM_011909          | 0.250999 | -2.71902 |
| Apol9b             | NM_173743          | 0.117611 | -2.72568 |
| Ifi27l2a           | NM_029803          | 0.116437 | -2.72604 |
|                    | ---                | 0.088632 | -2.73829 |
| EG545886           | AB256662           | 0.20286  | -2.75787 |

|               |              |          |          |
|---------------|--------------|----------|----------|
| Tspan1        | NM_133681    | 0.089039 | -2.76683 |
| Ldlrad3       | NM_178886    | 0.050311 | -2.8352  |
| LOC100044501  | XM_001472232 | 0.119105 | -2.87802 |
| 1700055N04Rik | AK081788     | 0.03032  | -2.96093 |
| Cdh19         | NM_001081386 | 0.028015 | -3.07028 |
| Mfsd4         | NM_001114662 | 0.026284 | -3.09621 |
|               | ---          | 0.2319   | -3.14342 |
| Abpa          | NM_009596    | 0.151376 | -3.32643 |
| Gcnt1         | NM_173442    | 0.00149  | -3.37106 |
|               | ---          | 0.000949 | -3.4074  |
|               | ---          | 0.250398 | -3.45319 |
| Apoc1         | NM_007469    | 0.068058 | -3.61227 |
| Npl           | NM_028749    | 0.000753 | -3.64734 |
|               | ---          | 0.091361 | -3.74479 |
| Rgs2          | NM_009061    | 0.003417 | -3.81328 |
| Dpp10         | NM_199021    | 0.01564  | -4.71333 |
| Hhipl2        | BC034362     | 0.000242 | -6.52572 |

---

---: unidentified genes, KO: Knockout, WT: Wild-type

**Table S4. Genes showing top fold-changes by microarray analyses**

| Gene                                                  | Symbol    | Accession number   | p-value<br>(KO/ WT) | Fold-change<br>(KO/ WT) |
|-------------------------------------------------------|-----------|--------------------|---------------------|-------------------------|
| Scrapie responsive gene 1                             | SCRG1     | NM_009136          | 0.0235309           | 3.867                   |
| Serine (or cysteine) peptidase inhibitor              | SERPINB5  | NM_009257          | 0.0824169           | 3.751                   |
| Chitinase, acidic                                     | CHIA      | NM_023186          | 0.302765            | 3.500                   |
| Lactalbumin, alpha                                    | LALBA     | NM_010679          | 0.151283            | 3.242                   |
| Zinc finger protein 521                               | ZNF521    | NM_145492          | 0.0207462           | 3.128                   |
| Amylase 2a1, pancreatic                               | AMY2A     | NM_001042712       | 0.359697            | 2.934                   |
| RIKEN cDNA 1700040L02 gene                            | C10ORF107 | BC087900           | 0.00404911          | 2.819                   |
| Claudin 8                                             | CLDN8     | NM_018778          | 0.0455989           | 2.663                   |
| Fermitin family homolog 1 (Drosophila)                | FERMT1    | NM_198029          | 0.317376            | 2.654                   |
| V-set domain containing T cell activation inhibitor 1 | VTCN1     | NM_178594          | 0.0226818           | 2.553                   |
| Dipeptidylpeptidase 10                                | DPP10     | NM_199021          | 0.0156397           | -4.713                  |
| Regulator of G-protein signaling 2                    | RGS2      | NM_009061          | 0.00341655          | -3.813                  |
| N-acetylneuraminate pyruvate lyase                    | NPL       | NM_028749          | 0.000753106         | -3.647                  |
| Glucosaminyl (N-acetyl) transferase 1, core 2         | GCNT1     | NM_173442          | 0.00148991          | -3.371                  |
| Cadherin 19, type 2                                   | CDH19     | NM_001081386       | 0.0280145           | -3.070                  |
| Aldehyde dehydrogenase 3 family, member B2            | ALDH3B2   | ENSMUST00000100032 | 0.0567148           | -2.961                  |
| Low density lipoprotein receptor class A domain       | LDLRAD3   | NM_178886          | 0.0503106           | -2.835                  |
| Tetraspanin 1                                         | TSPAN1    | NM_133681          | 0.0890391           | -2.767                  |
| Interferon, alpha-inducible protein 27 like 2A        | IFI27L2   | NM_029803          | 0.116437            | -2.726                  |
| Ubiquitin specific peptidase 18                       | USP18     | NM_011909          | 0.250999            | -2.719                  |

KO: Knockout, WT: Wild-type



**Table S5. Fold changes of major N-glycan-related enzymes and galectins**

| Gene                                                              | Symbol  | Accession number | p-value<br>(KO/ WT) | Fold-change |
|-------------------------------------------------------------------|---------|------------------|---------------------|-------------|
| Mannoside acetylglucosaminyltransferase 1                         | Mgat1   | NM_001110148     | 0.74                | 1.01        |
| Mannoside acetylglucosaminyltransferase 2                         | Mgat2   | NM_146035        | 0.35                | -1.05       |
| Mannoside acetylglucosaminyltransferase 3                         | Mgat3   | NM_010795        | 0.42                | -1.04       |
| Mannoside acetylglucosaminyltransferase 4, isoenzyme A            | Mgat4a  | NM_173870        | 0.94                | 1.01        |
| Mannoside acetylglucosaminyltransferase 4, isoenzyme B            | Mgat4b  | NM_145926        | 0.01                | -1.2        |
| Mannoside acetylglucosaminyltransferase 5                         | Mgat5   | NM_145128        | 0.0004              | -2.1        |
| Mannoside acetylglucosaminyltransferase 5, isoenzyme b            | Mgat5b  | NM_172948        | 0.05                | 1.07        |
| UDP-Gal:betaGlcNAc beta 1,4- galactosyltransferase, poly peptide1 | B4galt1 | NM_022305        | 0.42                | -1.15       |
| UDP-Gal:betaGlcNAc beta 1,4- galactosyltransferase, poly peptide2 | B4galt2 | NM_017377        | 0.56                | -1.08       |
| UDP-Gal:betaGlcNAc beta 1,4- galactosyltransferase, poly peptide3 | B4galt3 | NM_020579        | 0.68                | 1.02        |
| UDP-Gal:betaGlcNAc beta 1,4- galactosyltransferase, poly peptide4 | B4galt4 | NM_019804        | 0.43                | -1.12       |
| UDP-Gal:betaGlcNAc beta 1,4- galactosyltransferase, poly peptide5 | B4galt5 | NM_019835        | 0.13                | -1.31       |
| UDP-Gal:betaGlcNAc beta 1,4- galactosyltransferase, poly peptide6 | B4galt6 | NM_019737        | 0.73                | 1.05        |
| UDP-GlcNAc:betaGal beta-1,3-N-acetylglucosaminyltransferase 1     | B3gnt1  | NM_175383        | 0.30                | 1.04        |
| UDP-GlcNAc:betaGal beta-1,3-N-acetylglucosaminyltransferase 2     | B3gnt2  | NM_016888        | 0.83                | -1.03       |
| UDP-GlcNAc:betaGal beta-1,3-N-acetylglucosaminyltransferase 3     | B3gnt3  | NM_028189        | 0.39                | 1.10        |
| UDP-GlcNAc:betaGal beta-1,3-N-acetylglucosaminyltransferase 4     | B3gnt4  | NM_198611        | 0.45                | 1.10        |
| UDP-GlcNAc:betaGal beta-1,3-N-acetylglucosaminyltransferase 5     | B3gnt5  | NM_001159407     | 0.10                | -1.22       |
| UDP-GlcNAc:betaGal beta-1,3-N-acetylglucosaminyltransferase 6     | B3gnt6  | NM_001081167     | 0.36                | 1.09        |
| UDP-GlcNAc:betaGal beta-1,3-N-acetylglucosaminyltransferase 7     | B3gnt7  | NM_145222        | 0.12                | -1.10       |
| UDP-GlcNAc:betaGal beta-1,3-N-acetylglucosaminyltransferase 8     | B3gnt8  | NM_146184        | 0.03                | -1.66       |
| ST3 beta-galactoside alpha-2,3-sialyltransferase 1                | St3gal1 | NM_009177        | 0.14                | -1.58       |
| ST3 beta-galactoside alpha-2,3-sialyltransferase 2                | St3gal2 | NM_009179        | 0.42                | 1.11        |
| ST3 beta-galactoside alpha-2,3-sialyltransferase 3                | St3gal3 | NM_009176        | 0.16                | -1.27       |
| ST3 beta-galactoside alpha-2,3-sialyltransferase 4                | St3gal4 | NM_009178        | 0.02                | 1.35        |
| ST3 beta-galactoside alpha-2,3-sialyltransferase 5                | St3gal5 | NM_011375        | 0.98                | -1.01       |
| ST3 beta-galactoside alpha-2,3-sialyltransferase 6                | St3gal6 | NM_018784        | 0.96                | -1.00       |
| Beta galactoside alpha 2,6 sialyltransferase 1                    | St6gal1 | NM_145933        | 0.52                | -1.06       |
| Beta galactoside alpha 2,6 sialyltransferase 2                    | St6gal2 | NM_172829        | 0.38                | 1.16        |
| ST8 alpha-N-acetyl-neuraminide alpha-2,8-sialyltransferase 1      | St8sia1 | NM_011374        | 0.27                | -1.27       |
| ST8 alpha-N-acetyl-neuraminide alpha-2,8-sialyltransferase 2      | St8sia2 | NM_009181        | 0.96                | 1.00        |
| ST8 alpha-N-acetyl-neuraminide alpha-2,8-sialyltransferase 3      | St8sia3 | NM_009182        | 0.83                | -1.02       |
| ST8 alpha-N-acetyl-neuraminide alpha-2,8-sialyltransferase 4      | St8sia4 | NM_009183        | 0.03                | -1.24       |
| ST8 alpha-N-acetyl-neuraminide alpha-2,8-sialyltransferase 5      | St8sia5 | NM_153124        | 0.20                | 1.18        |
| ST8 alpha-N-acetyl-neuraminide alpha-2,8-sialyltransferase 6      | St8sia6 | NM_145838        | 0.64                | -1.07       |
| Glucosaminyl (N-acetyl) transferase 1, core 2                     | Gcmt1   | NM_173442        | 0.001               | -3.37       |
| Glucosaminyl (N-acetyl) transferase 2, I-branching enzyme         | Gcmt2   | NM_023887        | 0.98                | -1.00       |
| Glucosaminyl (N-acetyl) transferase 3, mucin type                 | Gcmt3   | NM_028087        | 0.53                | -1.10       |
| Fucosyltransferase 1                                              | Fut1    | NM_008051        | 0.32                | -1.16       |
| Fucosyltransferase 2                                              | Fut2    | NM_018876        | 0.23                | -1.13       |
| Fucosyltransferase 4                                              | Fut4    | NM_010242        | 0.15                | 1.16        |
| Fucosyltransferase 7                                              | Fut7    | NM_013524        | 0.88                | 1.00        |
| Fucosyltransferase 8                                              | Fut8    | NM_016893        | 0.19                | 1.28        |
| Fucosyltransferase 9                                              | Fut9    | NM_010243        | 0.38                | 1.23        |
| Fucosyltransferase 10                                             | Fut10   | NM_134161        | 0.43                | -1.08       |
| Fucosyltransferase 11                                             | Fut11   | NM_028428        | 0.34                | 1.10        |
| Mannosidase 1, alpha                                              | Man1a   | NM_008548        | 0.68                | 1.11        |
| mannosidase, alpha, class 1A, member 2                            | Man1a2  | NM_010763        | 0.02                | 1.17        |
| mannosidase, alpha, class 1C, member 1                            | Man1c1  | NM_207237        | 0.68                | 1.06        |
| mannosidase 2, alpha 1                                            | Man2a1  | NM_008549        | 0.17                | 1.16        |
| mannosidase 2, alpha 2                                            | Man2a2  | NM_172903        | 0.02                | -1.35       |
| Lectin, galactose binding, soluble 1                              | Lgals1  | NM_008495        | 0.47                | 1.08        |
| Lectin, galactose binding, soluble 2                              | Lgals2  | NM_025622        | 0.62                | 1.03        |
| Lectin, galactose binding, soluble 3                              | Lgals3  | NM_001145953     | 0.95                | 1.00        |
| Lectin, galactose binding, soluble 4                              | Lgals4  | NM_010706        | 0.38                | -1.09       |
| Lectin, galactose binding, soluble 7                              | Lgals7  | NM_008496        | 0.69                | -1.06       |
| Lectin, galactose binding, soluble 8                              | Lgals8  | NM_018886        | 0.69                | 1.02        |
| Lectin, galactose binding, soluble 9                              | Lgals9  | NM_010708        | 0.24                | -1.96       |
| Lectin, galactose binding, soluble 12                             | Lgals12 | NM_019516        | 0.94                | -1.02       |

KO: Knockout, WT: Wild-type

**Table S6. Fold changes for major growth factor receptors and integrins**

| Gene                                                       | Symbol | Accession number | p-value   | Fold-change (KO/ WT) |
|------------------------------------------------------------|--------|------------------|-----------|----------------------|
| <b>Growth factor receptors</b>                             |        |                  |           |                      |
| Epidermal growth factor receptor                           | Egfr   | NM_207655        | 0.226926  | 1.08447              |
| v-erb-b2 erythroblastic leukemia viral oncogene homolog    | ErbB2  | NM_001003817     | 0.453444  | -1.08611             |
| v-erb-b2 erythroblastic leukemia viral oncogene homolog 3  | ErbB3  | NM_010153        | 0.0898661 | 1.1808               |
| v-erb-a erythroblastic leukemia viral oncogene homolog 4   | ErbB4  | NM_010154        | 0.957624  | 1.01974              |
| Fibroblast growth factor receptor 1                        | Fgfr1  | NM_010206        | 0.055296  | 1.42813              |
| Fibroblast growth factor receptor 2                        | Fgfr2  | NM_010207        | 0.120927  | -1.46872             |
| Fibroblast growth factor receptor 3                        | Fgfr3  | NM_008010        | 0.963771  | -1.00325             |
| Fibroblast growth factor receptor 3                        | Fgfr4  | NM_008011        | 0.336899  | 1.07013              |
| Transforming growth factor, beta receptor I                | Tgfr1  | NM_009370        | 0.0286279 | 1.18104              |
| Transforming growth factor, beta receptor II               | Tgfr2  | NM_009371        | 0.579646  | -1.13361             |
| Transforming growth factor, beta receptor III              | Tgfr3  | NM_011578        | 0.873379  | 1.01872              |
| Platelet derived growth factor receptor, alpha polypeptide | Pdgfra | NM_011058        | 0.547481  | 1.11775              |
| Platelet derived growth factor receptor, beta polypeptide  | Pdgfrb | NM_001146268     | 0.686129  | -1.03521             |
| Insulin-like growth factor I receptor                      | Igf1r  | NM_010513        | 0.114178  | 1.63282              |
| Insulin-like growth factor 2 receptor                      | Igf2r  | NM_010515        | 0.473084  | 1.07524              |
| <b>Integrins</b>                                           |        |                  |           |                      |
| Integrin beta 1 (fibronectin receptor beta)                | Itgb1  | NM_010578        | 0.0115619 | 1.28233              |
| Integrin beta 2                                            | Itgb2  | NM_008404        | 0.261101  | -1.05837             |
| Integrin beta 3                                            | Itgb3  | NM_016780        | 0.862831  | 1.04203              |
| Integrin beta 4                                            | Itgb4  | NM_001005608     | 0.800576  | 1.01401              |
| Integrin beta 5                                            | Itgb5  | NM_001145884     | 0.30287   | 1.14265              |
| Integrin beta 6                                            | Itgb6  | NM_001159564     | 0.515293  | 1.14611              |
| Integrin beta 7                                            | Itgb7  | NM_013566        | 0.0909787 | -1.08144             |
| Integrin beta 8                                            | Itgb8  | NM_177290        | 0.186688  | 1.18508              |
| Integrin alpha 1                                           | Itga1  | NM_001033228     | 0.356648  | -1.27442             |
| Integrin alpha 2                                           | Itga2  | NM_008396        | 0.198102  | 1.29557              |
| Integrin alpha 3                                           | Itga3  | NM_013565        | 0.600712  | 1.05675              |
| Integrin alpha 4                                           | Itga4  | NM_010576        | 0.439389  | -1.12907             |
| Integrin alpha 5 (fibronectin receptor alpha)              | Itga5  | NM_010577        | 0.0302691 | -1.2422              |
| Integrin alpha 6                                           | Itga6  | NM_008397        | 0.290547  | -1.1494              |
| Integrin alpha 7                                           | Itga7  | NM_008398        | 0.399622  | -1.04407             |
| Integrin alpha 8                                           | Itga8  | NM_001001309     | 0.530318  | 1.12615              |
| Integrin alpha 9                                           | Itga9  | NM_133721        | 0.215066  | -1.25473             |
| Integrin alpha 10                                          | Itga10 | NM_001081053     | 0.212197  | -1.04209             |
| Integrin alpha 11                                          | Itga11 | NM_176922        | 0.155082  | -1.16072             |

KO: Knockout, WT: Wild-type
